# Supplementary material for: Sequencing and Validation of Reference Genes to Analyze Endogenous Gene Expression and Quantify Yellow Dwarf Viruses Using RT-qPCR in Viruliferous Rhopalosiphum padi
Source: PubMed Central journal article supplement (PMC4014588; doi:10.1371/journal.pone.0097038), 2014-05-08

**A**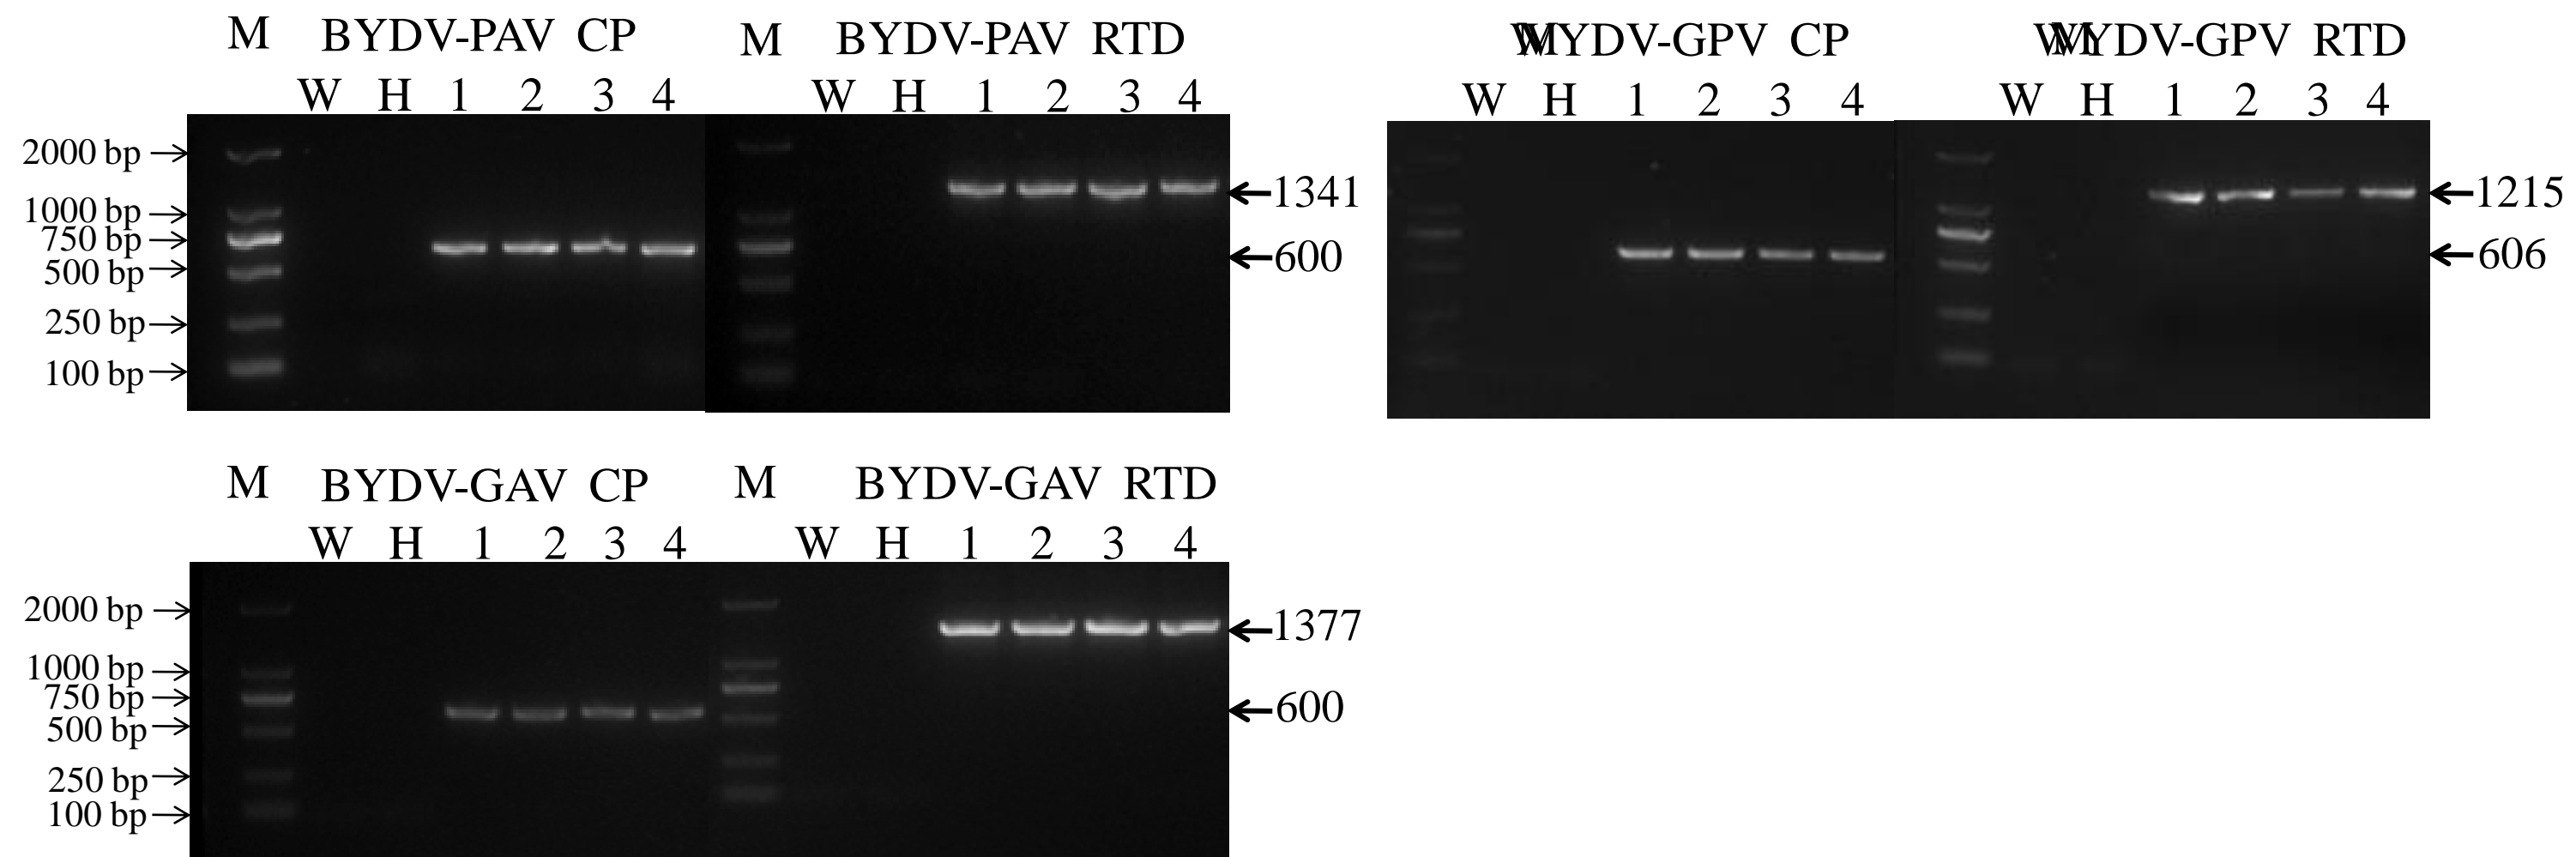**B**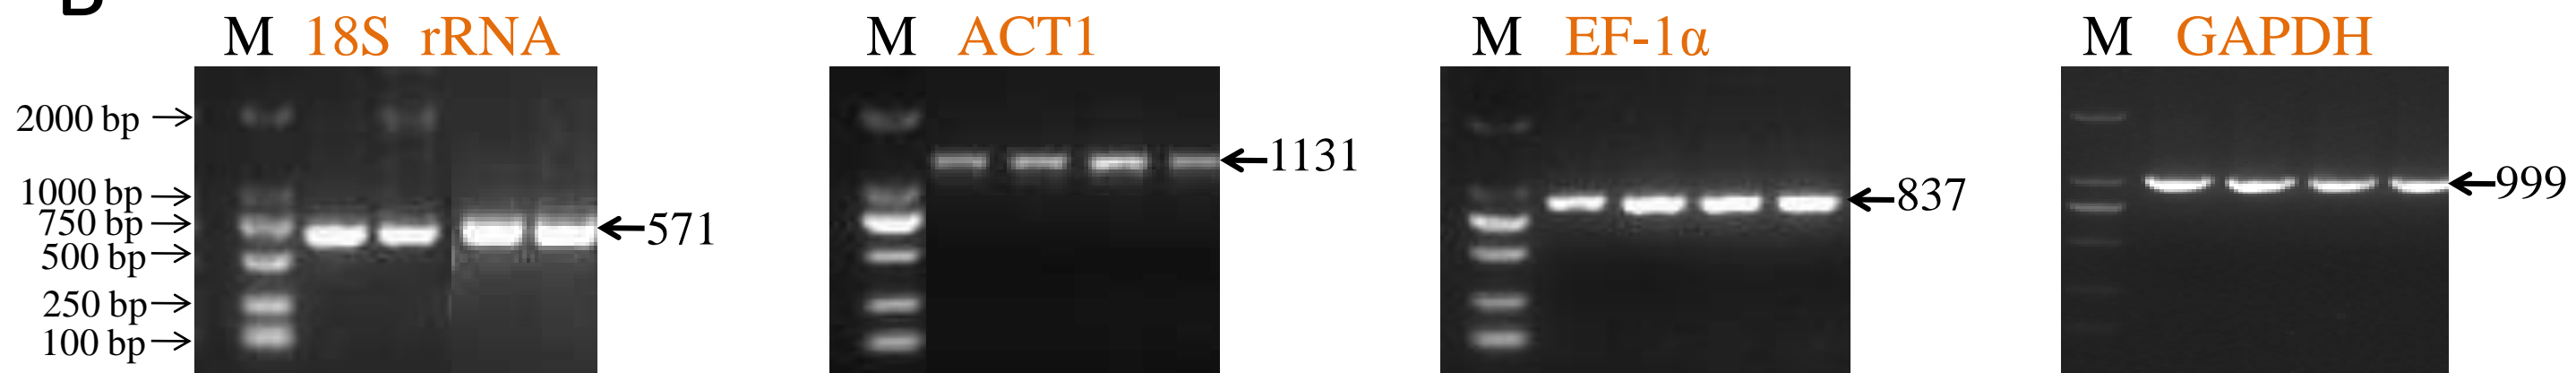**C**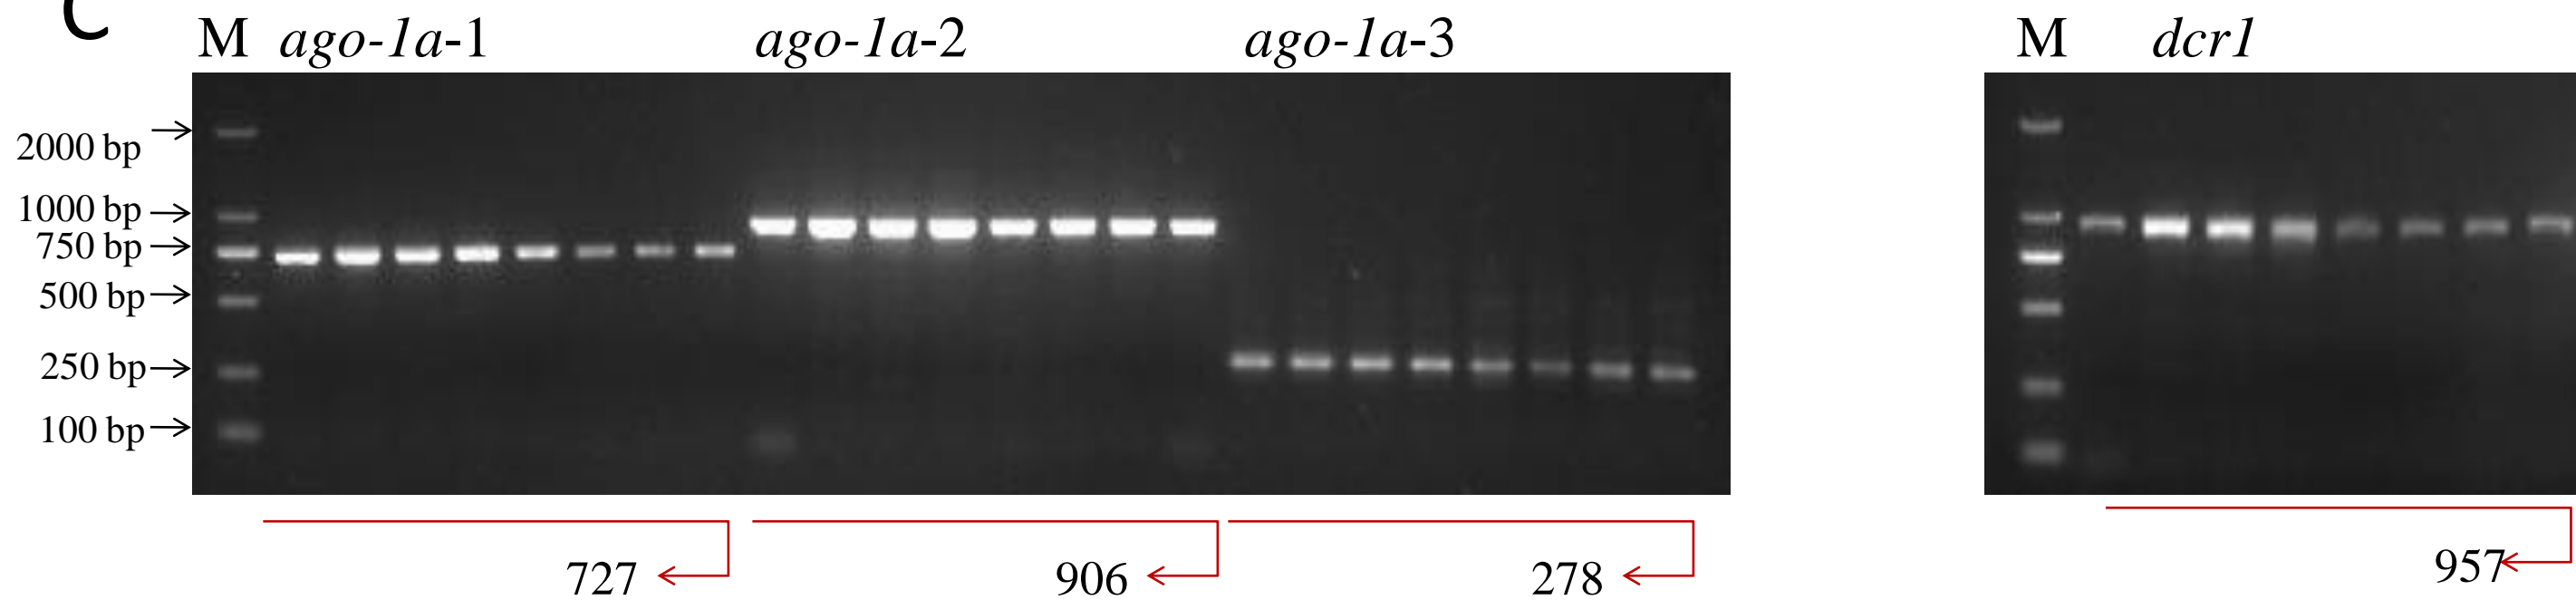

Supplement: pone.0097038.s002.pdf [file pone.0097038.s002.pdf]
