# Supplementary material for: Sequencing and Validation of Reference Genes to Analyze Endogenous Gene Expression and Quantify Yellow Dwarf Viruses Using RT-qPCR in Viruliferous Rhopalosiphum padi
Source: PubMed Central journal article supplement (PMC4014588; doi:10.1371/journal.pone.0097038), 2014-05-08
Supplement: pone.0097038.s004.pdf [file pone.0097038.s004.pdf]

# Relative standard curves to determine amplification efficiency for each gene

18S rRNA

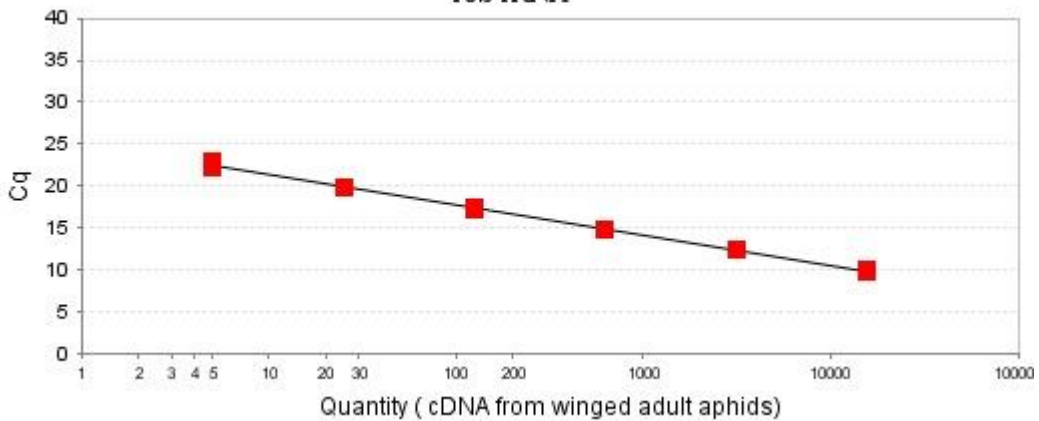

18S rRNA

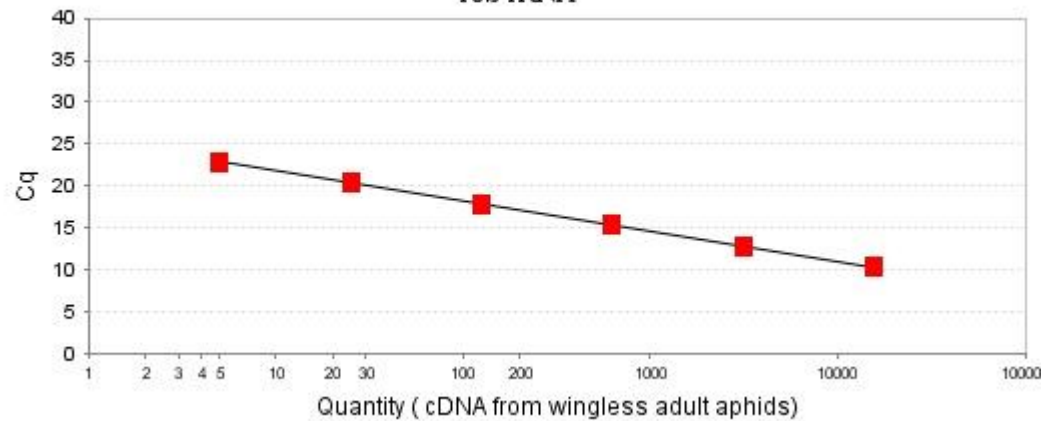

ACT1

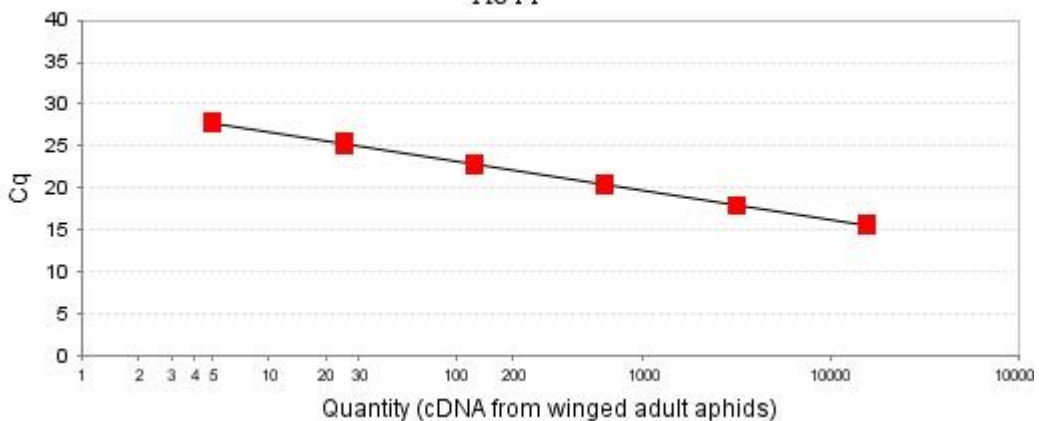

ACT1

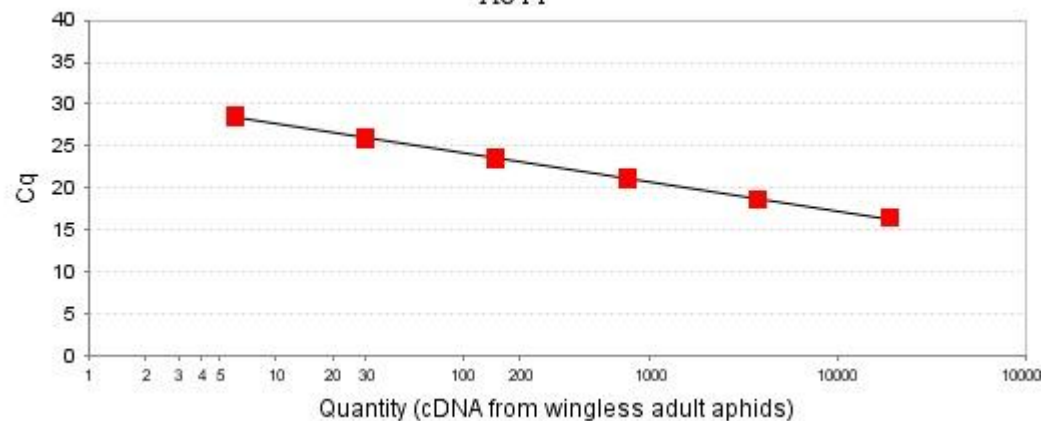

EF-1 $\alpha$

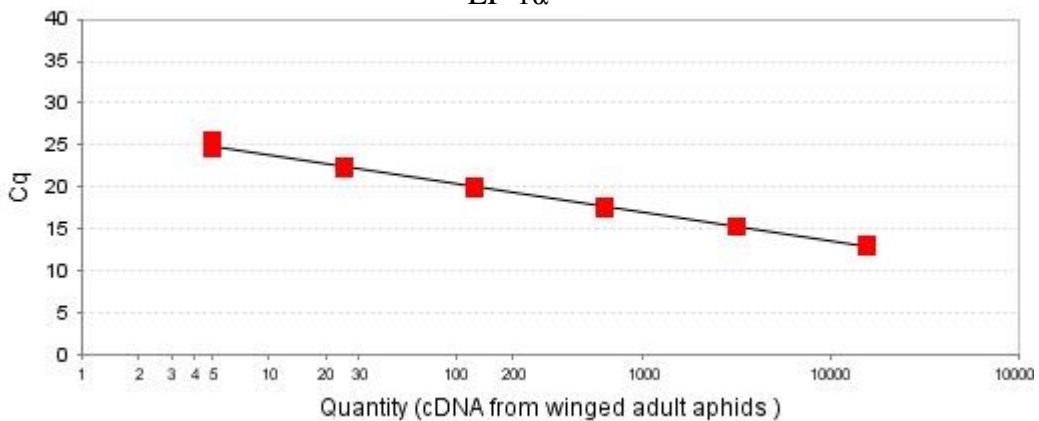

EF-1 $\alpha$

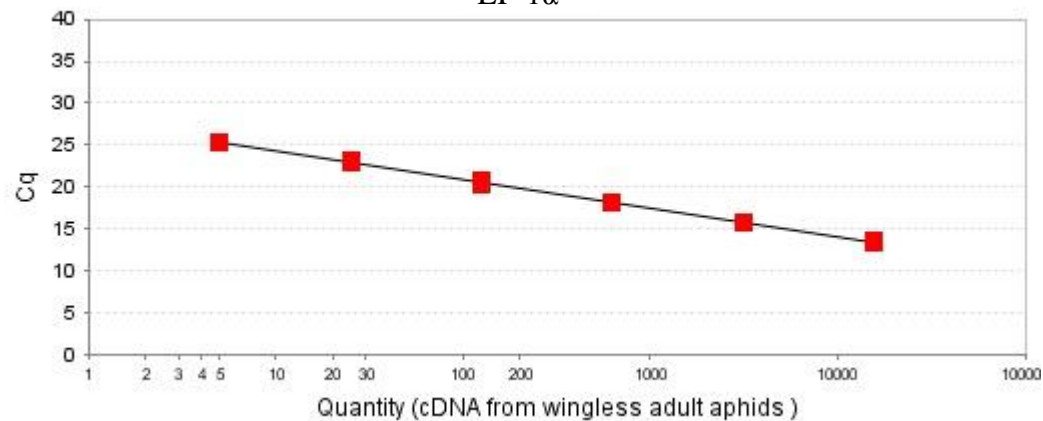

GAPDH

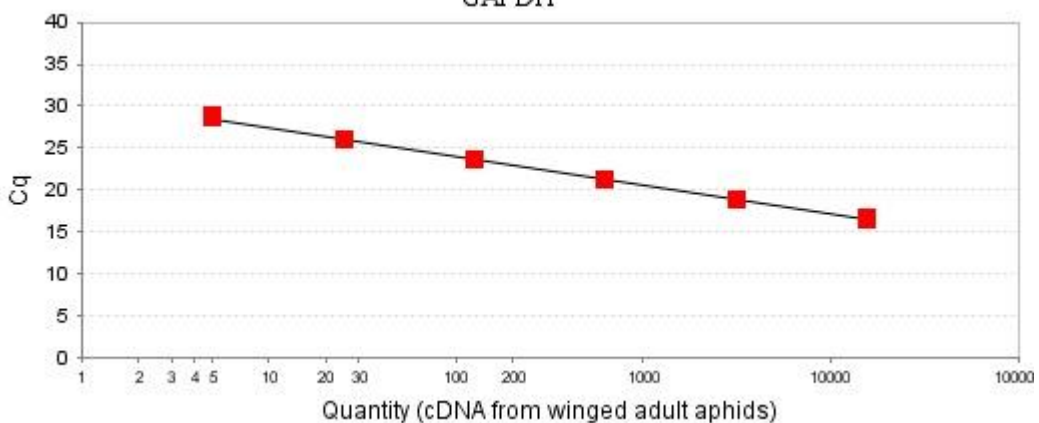

GAPDH

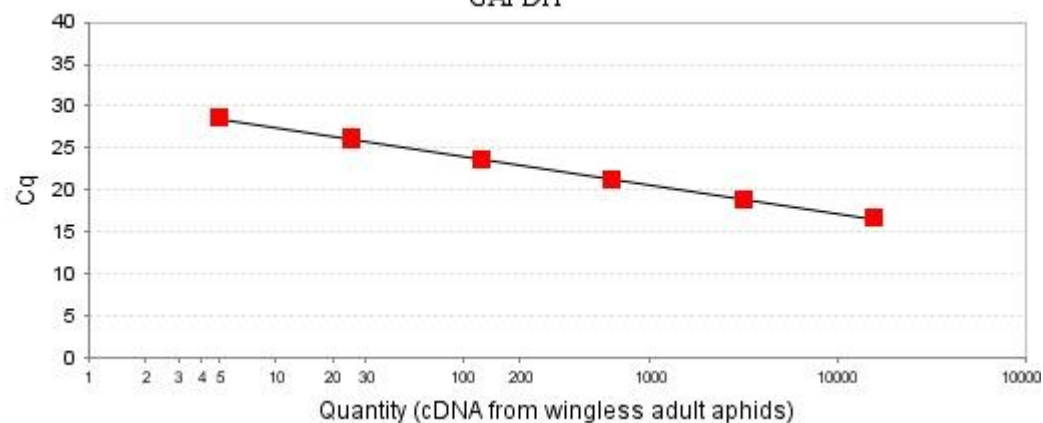

*ago-1a-1*

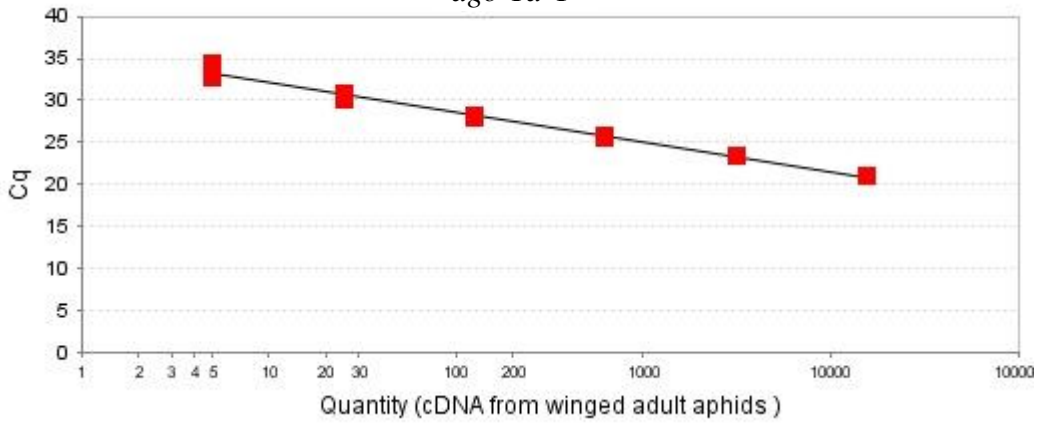

*ago-1a-1*

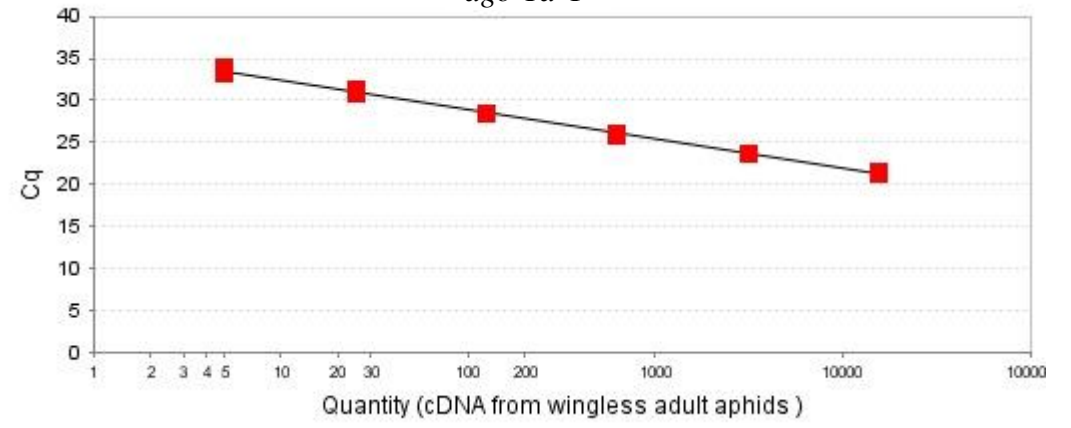

*ago-1a-2*

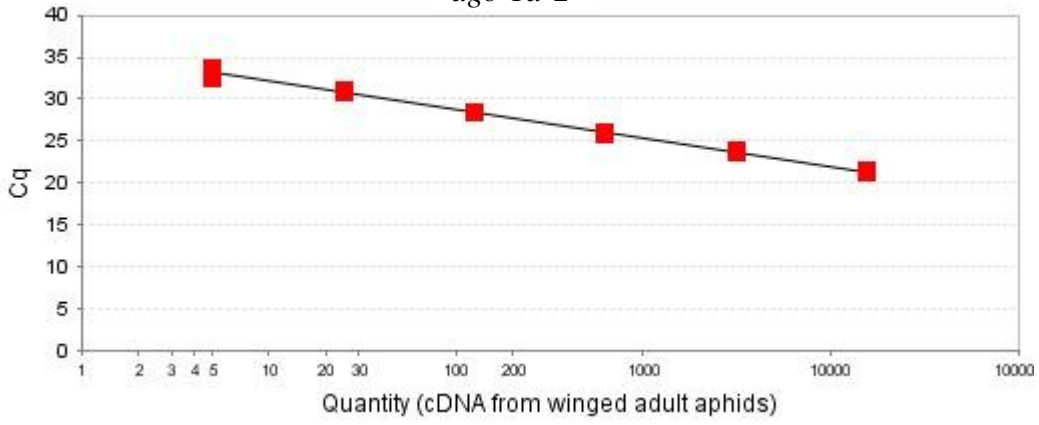

*ago-1a-2*

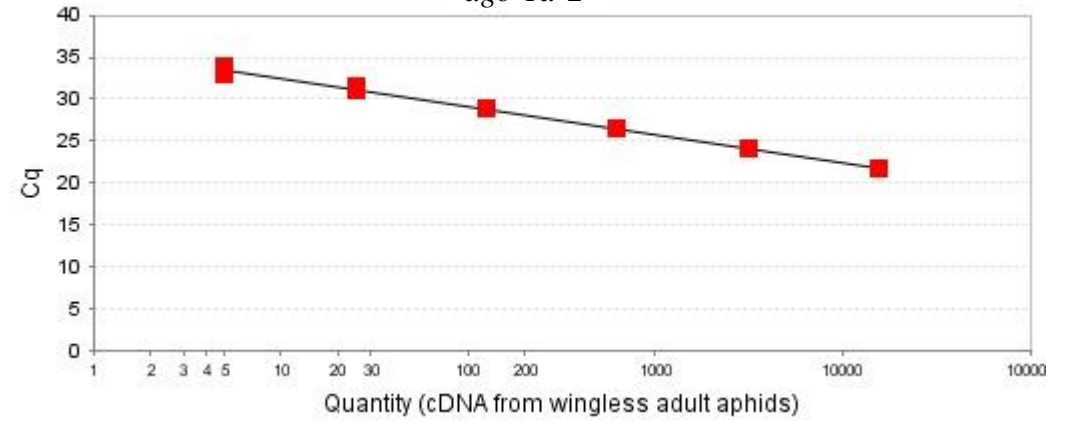

*ago-1a-3*

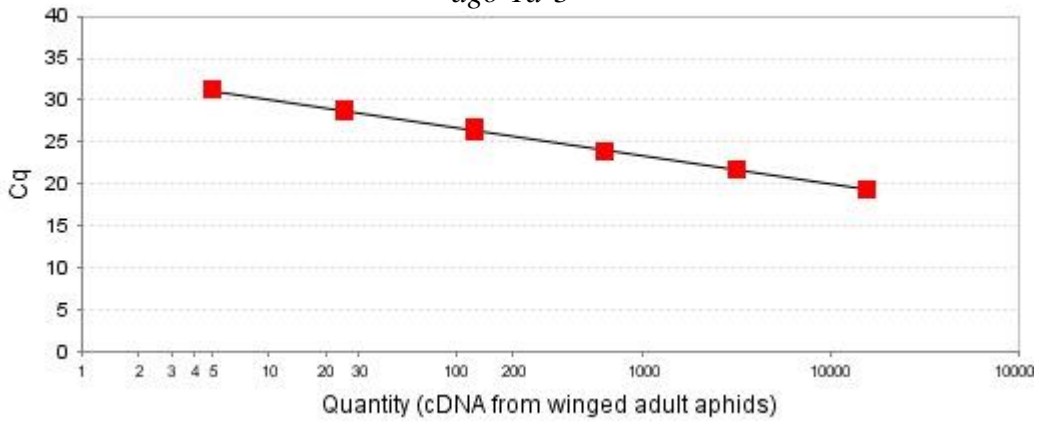

*ago-1a-3*

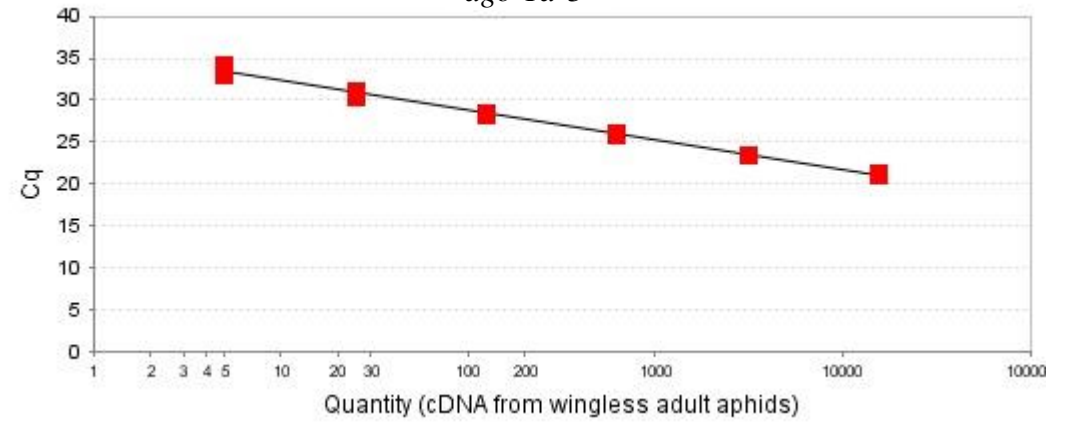

*dcr1*

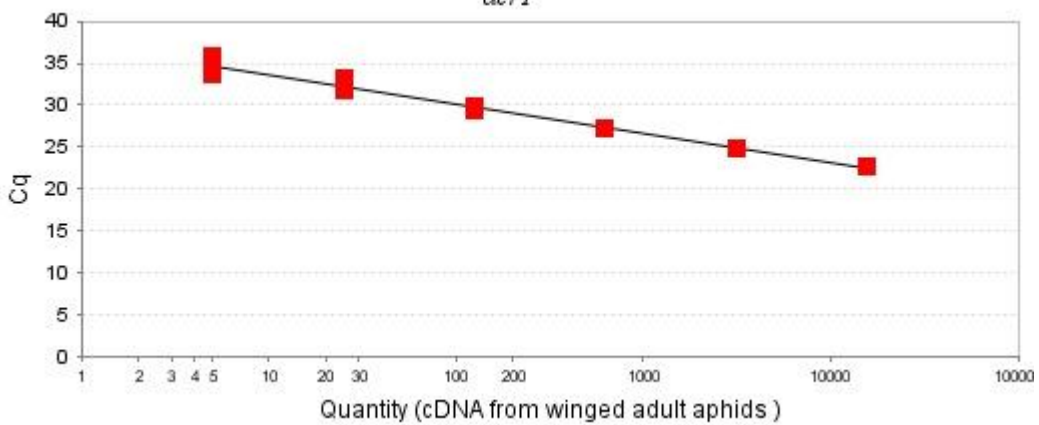

*dcr1*

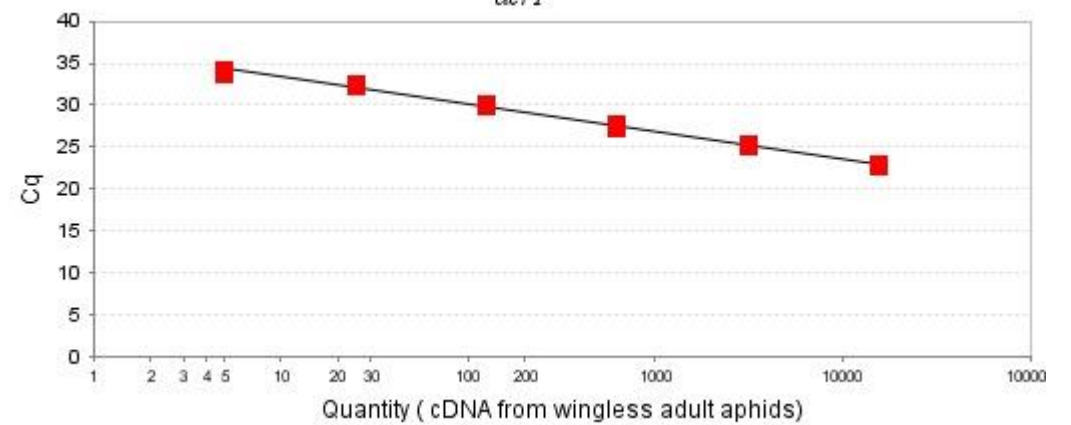

WYDV-GPV CP

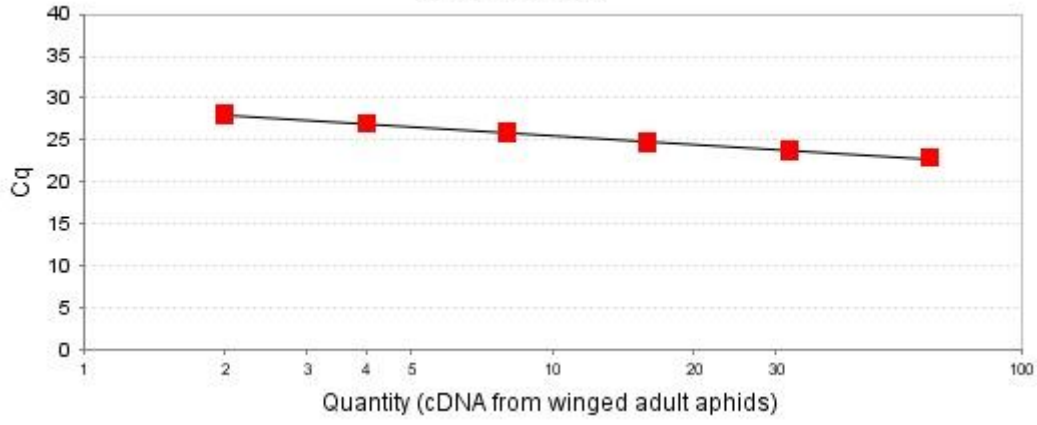

WYDV-GPV CP

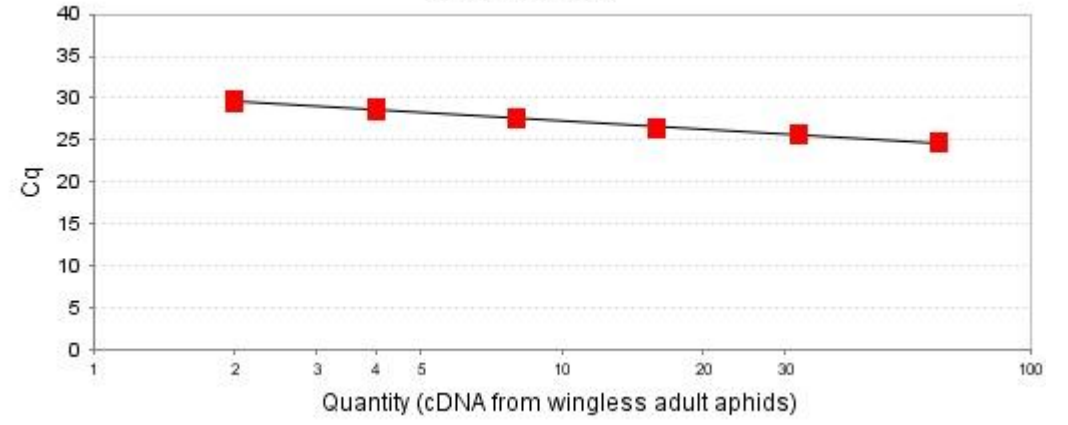

WYDV-GPV RTD

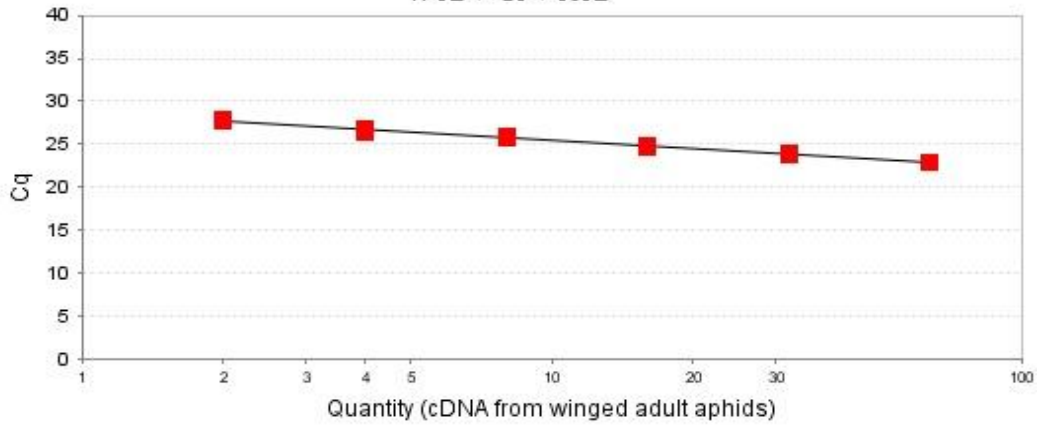

WYDV-GPV RTD

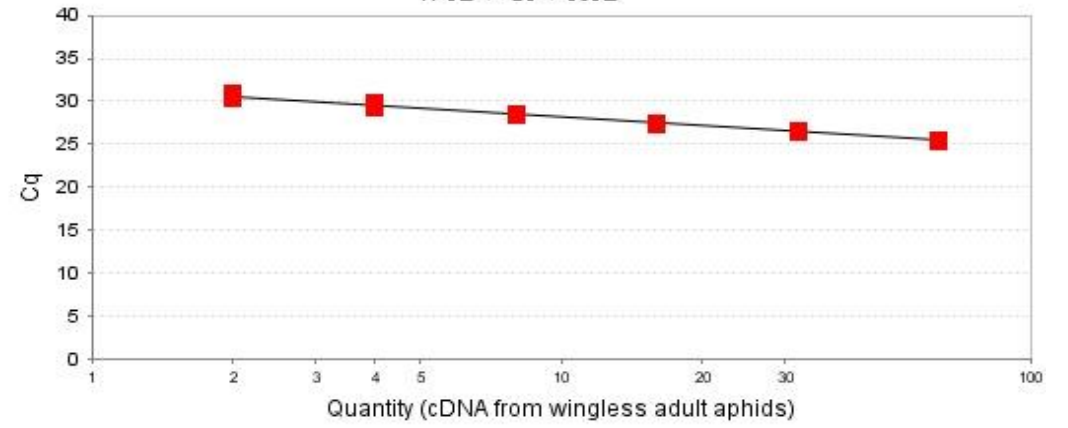

BYDV-PAV CP

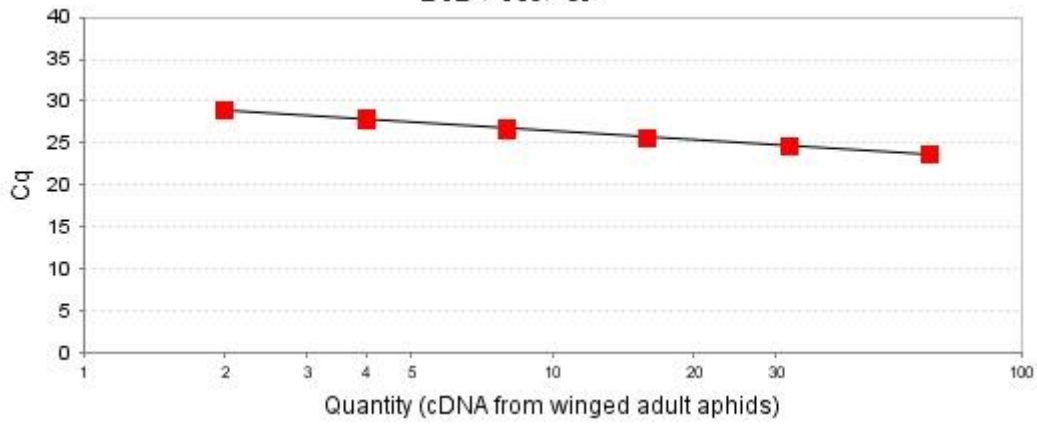

BYDV-PAV CP

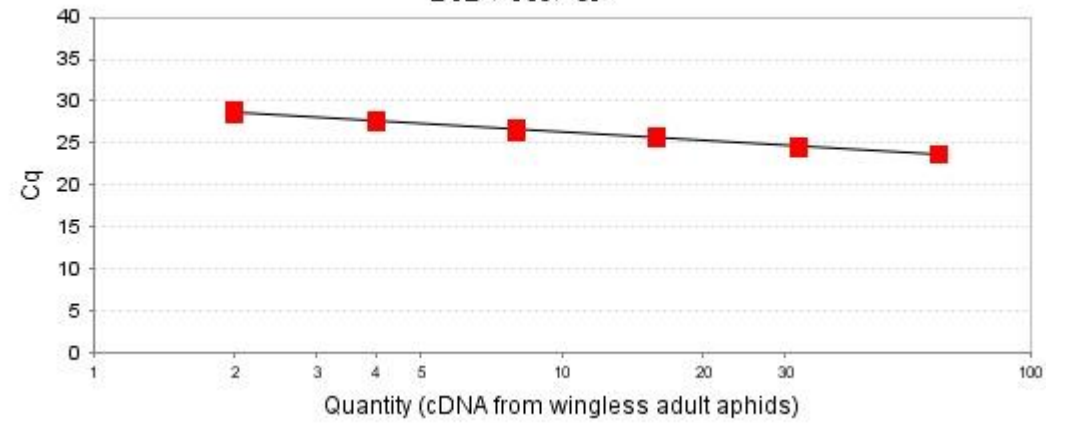

BYDV-PAV RTD

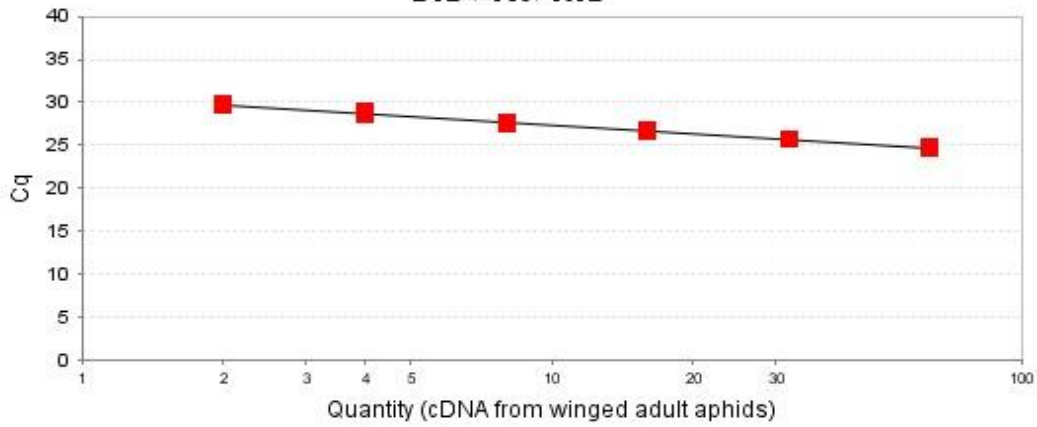

BYDV-PAV RTD

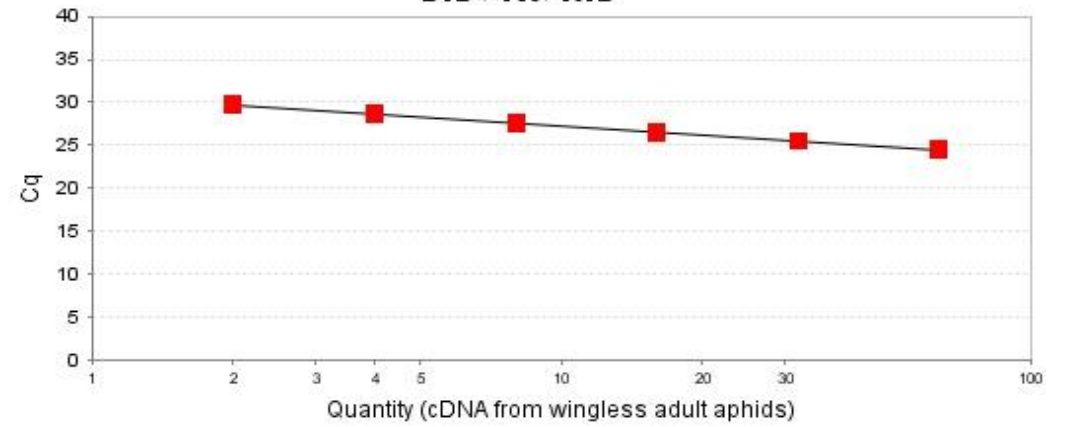

BYDV-GAV CP

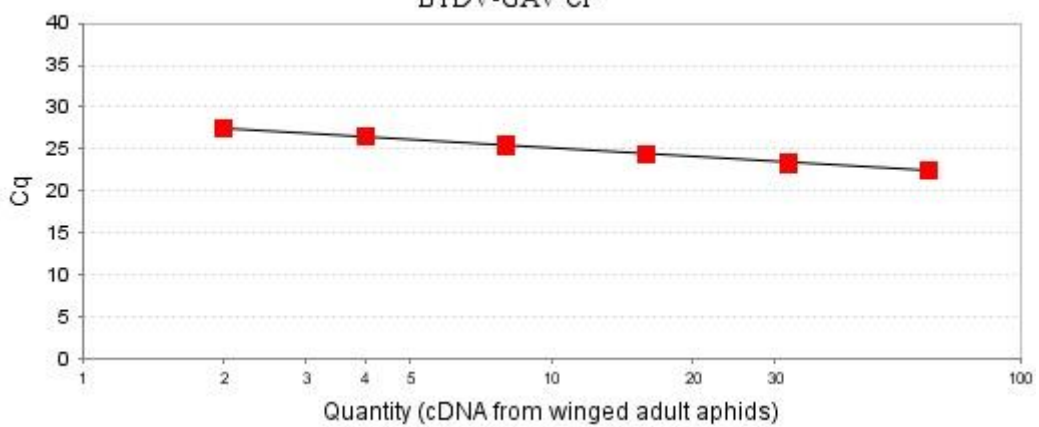

BYDV-GAV CP

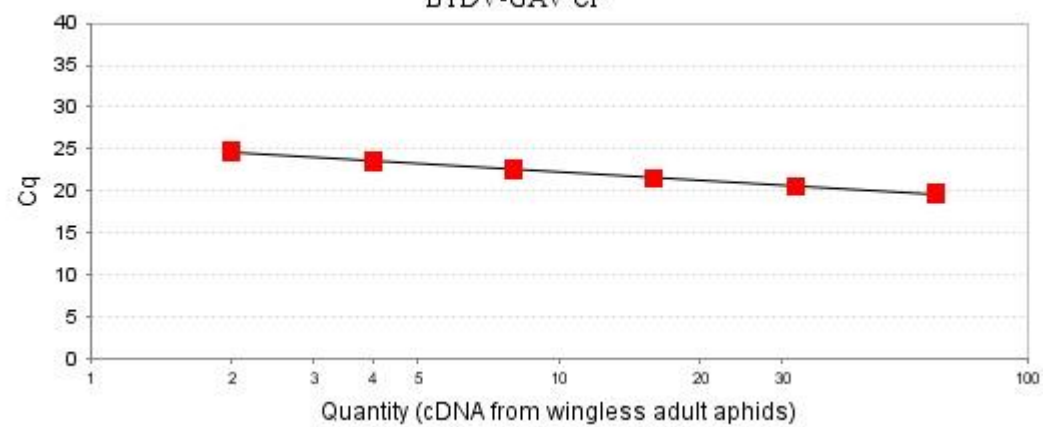

BYDV-GAV RTD

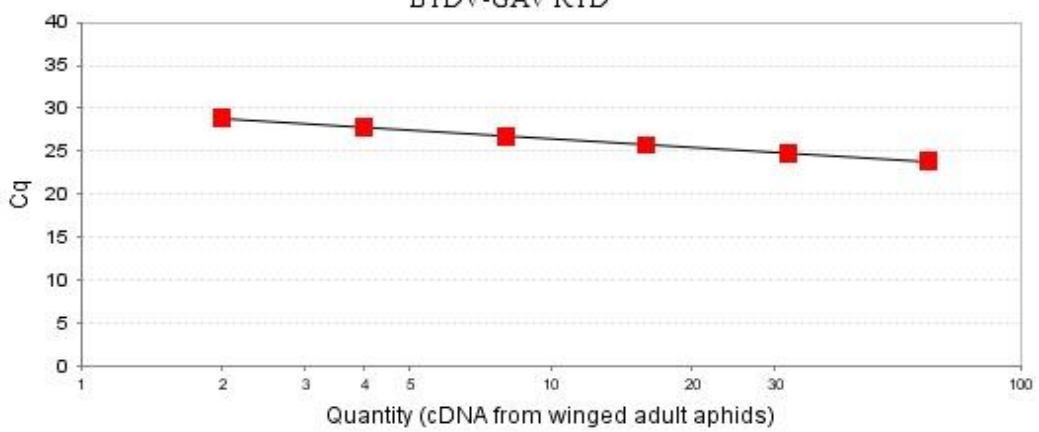

BYDV-GAV RTD

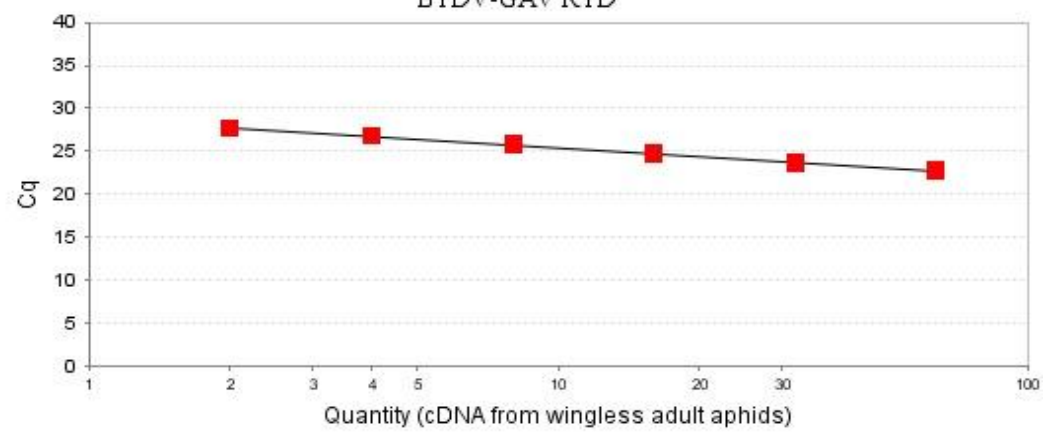

## Description of relative standard curves

| Gene            | Slope<br>(winged/wingless) | Intercept<br>(winged/wingless) | $R^2$<br>(winged/wingless) | Efficiency (%)<br>(winged/wingless) | Dilution range              |
|-----------------|----------------------------|--------------------------------|----------------------------|-------------------------------------|-----------------------------|
| 18S rRNA        | -3.573/-3.558              | 24.893/25.331                  | 0.999/0.999                | 90.506/91.014                       | 5-fold, $5^{-1}$ ~ $5^{-6}$ |
| ACT1            | -3.484/-3.446              | 30.22/31.119                   | 0.999/0.999                | 93.665/95.067                       | 5-fold, $5^{-1}$ ~ $5^{-6}$ |
| EF-1 $\alpha$   | -3.424/-3.392              | 27.284/24.679                  | 0.998/0.999                | 95.902/97.157                       | 5-fold, $5^{-1}$ ~ $5^{-6}$ |
| GAPDH           | -3.453/-3.416              | 30.962/30.936                  | 0.999/1.000                | 94.814/96.216                       | 5-fold, $5^{-1}$ ~ $5^{-6}$ |
| <i>ago-1a-1</i> | -3.533/-3.541              | 35.733/36.038                  | 0.991/0.997                | 91.891/91.594                       | 5-fold, $5^{-1}$ ~ $5^{-6}$ |
| <i>ago-1a-2</i> | -3.361/-3.345              | 35.494/35.865                  | 0.996/0.997                | 98.391/99.05                        | 5-fold, $5^{-1}$ ~ $5^{-6}$ |
| <i>ago-1a-3</i> | -3.389/-3.537              | 33.556/35.831                  | 0.999/0.994                | 97.263/91.749                       | 5-fold, $5^{-1}$ ~ $5^{-6}$ |
| <i>dcr1</i>     | -3.478/-3.282              | 37.124/36.701                  | 0.986/0.995                | 93.875/101.698                      | 5-fold, $5^{-1}$ ~ $5^{-6}$ |
| WYDV-GPV<br>CP  | -3.454/-3.278              | 29.059/30.621                  | 0.996/0.992                | 94.75/101.875                       | 2-fold, $2^{-1}$ ~ $2^{-6}$ |
| WYDV-GPV<br>RTD | -3.255/-3.416              | 28.757/31.599                  | 0.994/0.989                | 102.875/96.203                      | 2-fold, $2^{-1}$ ~ $2^{-6}$ |
| BYDV-PAV<br>CP  | -3.484/-3.368              | 29.871/29.675                  | 0.996/0.994                | 93.65/98.105                        | 2-fold, $2^{-1}$ ~ $2^{-6}$ |
| BYDV-PAV<br>RTD | -3.315/-3.513              | 30.722/30.837                  | 0.995/0.998                | 100.303/92.586                      | 2-fold, $2^{-1}$ ~ $2^{-6}$ |
| BYDV-GAV<br>CP  | -3.402/-3.308              | 28.555/25.615                  | 0.999/0.997                | 96.752/100.563                      | 2-fold, $2^{-1}$ ~ $2^{-6}$ |
| BYDV-GAV<br>RTD | -3.356/-3.319              | 29.842/28.765                  | 0.998/0.996                | 98.585/100.127                      | 2-fold, $2^{-1}$ ~ $2^{-6}$ |
