# Supplementary material for: Sequencing and Validation of Reference Genes to Analyze Endogenous Gene Expression and Quantify Yellow Dwarf Viruses Using RT-qPCR in Viruliferous Rhopalosiphum padi
Source: PubMed Central journal article supplement (PMC4014588; doi:10.1371/journal.pone.0097038), 2014-05-08
Supplement: pone.0097038.s005.pdf [file pone.0097038.s005.pdf]

Table1 Result of best BLAST search hit

| Query sequence/gene | Description                                                                                                 | Max Score | Total Score | Query coverage | E value | Identity | Hit accession number           |
|---------------------|-------------------------------------------------------------------------------------------------------------|-----------|-------------|----------------|---------|----------|--------------------------------|
| 18S rRNA            | Rhopalosiphum padi 18S ribosomal RNA gene, partial sequence                                                 | 1031      | 1031        | 100%           | 0.0     | 100%     | <a href="#">U27825.1</a>       |
| ACT1                | Acyrthosiphon pisum actin (LOC100145822), mRNA                                                              | 1837      | 1837        | 100%           | 0.0     | 96%      | <a href="#">NM_001126200.2</a> |
| EF-1 $\alpha$       | Megoura crassicauda EF1a mRNA for elongation factor 1-alpha-like protein, partial cds, clone: Mcra-Tokyo-29 | 1285      | 1285        | 100%           | 0.0     | 94%      | <a href="#">AB627794.1</a>     |
| GAPDH               | PREDICTED: Acyrthosiphon pisum glyceraldehyde-3-phosphate dehydrogenase-like (LOC100169122), mRNA           | 1599      | 1599        | 100%           | 0.0     | 95%      | <a href="#">XM_001943014.2</a> |
