# Supplementary material for: Sequencing and Validation of Reference Genes to Analyze Endogenous Gene Expression and Quantify Yellow Dwarf Viruses Using RT-qPCR in Viruliferous Rhopalosiphum padi
Source: PubMed Central journal article supplement (PMC4014588; doi:10.1371/journal.pone.0097038), 2014-05-08
Supplement: pone.0097038.s006.pdf [file pone.0097038.s006.pdf]

Table 2 BestKeeper analysis for the virus titre in YDVs-viruliferous winged adult of *Rhopalosiphum padi*

|                                 | <b>GPV-CP</b> | <b>GPV-RTD</b> | <b>PAV-CP</b> | <b>PAV-RTD</b> | <b>GAV-CP</b> | <b>GAV-RTD</b> |
|---------------------------------|---------------|----------------|---------------|----------------|---------------|----------------|
| <b><i>n</i></b>                 | 24            | 24             | 24            | 24             | 24            | 24             |
| <b>Geo Mean [Cq]</b>            | <b>25.36</b>  | <b>25.92</b>   | <b>25.07</b>  | <b>25.72</b>   | <b>25.18</b>  | <b>25.44</b>   |
| <b>Ar Mean [Cq]</b>             | <b>25.39</b>  | <b>25.96</b>   | <b>25.12</b>  | <b>25.77</b>   | <b>25.19</b>  | <b>25.45</b>   |
| <b>Min [Cq]</b>                 | 23.77         | 24.18          | 23.24         | 23.90          | 23.91         | 24.33          |
| <b>Max [Cq]</b>                 | 27.99         | 28.56          | 30.22         | 31.20          | 27.17         | 27.27          |
| <b>SD [<math>\pm</math> Cq]</b> | <b>1.14</b>   | <b>1.16</b>    | <b>1.18</b>   | <b>1.25</b>    | <b>0.59</b>   | <b>0.62</b>    |
| <b>CV [% Cq]</b>                | <b>4.48</b>   | <b>4.47</b>    | <b>4.68</b>   | <b>4.87</b>    | <b>2.35</b>   | <b>2.42</b>    |
