# Supplementary material for: Sequencing and Validation of Reference Genes to Analyze Endogenous Gene Expression and Quantify Yellow Dwarf Viruses Using RT-qPCR in Viruliferous Rhopalosiphum padi
Source: PubMed Central journal article supplement (PMC4014588; doi:10.1371/journal.pone.0097038), 2014-05-08
Supplement: pone.0097038.s007.pdf [file pone.0097038.s007.pdf]

Table 3 BestKeeper analysis for the virus titre in YDVs-viruliferous wingless adult of *Rhopalosiphum padi*

|                      | <b>GPV-CP</b> | <b>GPV-RTD</b> | <b>PAV-CP</b> | <b>PAV-RTD</b> | <b>GAV-CP</b> | <b>GAV-RTD</b> |
|----------------------|---------------|----------------|---------------|----------------|---------------|----------------|
| <b><i>n</i></b>      | 24            | 24             | 24            | 24             | 24            | 24             |
| <b>Geo Mean [Cq]</b> | <b>25.02</b>  | <b>25.76</b>   | <b>24.20</b>  | <b>25.23</b>   | <b>24.20</b>  | <b>24.33</b>   |
| <b>Ar Mean [Cq]</b>  | <b>25.05</b>  | <b>25.79</b>   | <b>24.25</b>  | <b>25.28</b>   | <b>24.22</b>  | <b>24.35</b>   |
| <b>Min [Cq]</b>      | 23.34         | 24.02          | 22.22         | 23.14          | 22.67         | 22.51          |
| <b>Max [Cq]</b>      | 28.30         | 28.97          | 28.26         | 29.20          | 26.68         | 26.29          |
| <b>SD [± Cq]</b>     | <b>1.02</b>   | <b>1.08</b>    | <b>1.32</b>   | <b>1.36</b>    | <b>0.87</b>   | <b>0.85</b>    |
| <b>CV [% Cq]</b>     | <b>4.08</b>   | <b>4.19</b>    | <b>5.46</b>   | <b>5.36</b>    | <b>3.61</b>   | <b>3.50</b>    |
